# Supplementary material for: Development and preliminary evaluation of a quality of life measure targeted at dementia caregivers
Source: PubMed Central journal article supplement (PMC2706224; doi:10.1186/1477-7525-7-56), 2009-06-21
Supplement: 1477-7525-7-56-S2.pdf [file 1477-7525-7-56-S2.pdf]

**STEP 1: RECODING ITEMS**

| ITEM NUMBERS                                                                                                                                                                  | CHANGE ORIGINAL RESPONSE CATEGORY * | TO RECODED VALUE OF: |
|-------------------------------------------------------------------------------------------------------------------------------------------------------------------------------|-------------------------------------|----------------------|
| 1, 2, 3, 4, 5, 6, 7, 8, 9, 10,<br>11, 12, 13, 14, 15, 16, 17, 18                                                                                                              | 1 →                                 | 0                    |
|                                                                                                                                                                               | 2 →                                 | 50                   |
|                                                                                                                                                                               | 3 →                                 | 100                  |
| 28, 35, 36, 45, 46, 47, 48,<br>49, 50, 51, 52, 53, 54, 55,<br>57, 58, 59, 60, 61, 63, 79, 80                                                                                  | 1 →                                 | 100                  |
|                                                                                                                                                                               | 2 →                                 | 75                   |
|                                                                                                                                                                               | 3 →                                 | 50                   |
|                                                                                                                                                                               | 4 →                                 | 25                   |
|                                                                                                                                                                               | 5 →                                 | 0                    |
| 19, 20, 21, 22, 23, 24, 25,<br>26, 27, 29, 30, 31, 32, 33,<br>34, 37, 38, 39, 40, 41, 42,<br>43, 44, 56, 62, 64, 65, 66,<br>67, 68, 69, 70, 71, 72, 73,<br>74, 75, 76, 77, 78 | 1 →                                 | 0                    |
|                                                                                                                                                                               | 2 →                                 | 25                   |
|                                                                                                                                                                               | 3 →                                 | 50                   |
|                                                                                                                                                                               | 4 →                                 | 75                   |
|                                                                                                                                                                               | 5 →                                 | 100                  |

\* Precorded response choices as printed in the questionnaire.

**STEP 2: AVERAGING ITEMS TO FORM SCALES**

| SCALE                                                   | NUMBER OF ITEMS | AFTER RECODING PER STEP 1, AVERAGE THE FOLLOWING ITEMS                         |
|---------------------------------------------------------|-----------------|--------------------------------------------------------------------------------|
| Assistance with instrumental activities of daily living | 13              | 1, 2, 3, 4, 5, 6, 7, 8, 9, 10, 11, 12, 13                                      |
| Assistance with activities of daily living              | 5               | 14, 15, 16, 17, 18                                                             |
| Role limitations due to caregiving                      | 5               | 19, 20, 21, 22, 23                                                             |
| Personal time                                           | 4               | 24, 28, 35, 56                                                                 |
| Family Interaction                                      | 6               | 25, 26, 27, 36, 37, 80                                                         |
| Demands of caregiving                                   | 7               | 29, 30, 38, 39, 40, 41, 57                                                     |
| Worry                                                   | 9               | 31, 32, 33, 34, 42, 43, 44, 58, 59                                             |
| Spirituality and faith                                  | 3               | 45, 46, 47                                                                     |
| Benefits of caregiving                                  | 8               | 48, 49, 50, 51, 52, 53, 54, 55                                                 |
| Caregiver feelings                                      | 20              | 60, 61, 62, 63, 64, 65, 66, 67, 68, 69, 70, 71, 72, 73, 74, 75, 76, 77, 78, 79 |
