# Supplementary material for: Development and preliminary evaluation of a quality of life measure targeted at dementia caregivers
Source: PubMed Central journal article supplement (PMC2706224; doi:10.1186/1477-7525-7-56), 2009-06-21
Supplement: 1477-7525-7-56-S3.pdf [file 1477-7525-7-56-S3.pdf]

**Table S1: Associations between caregiver and patient characteristics and caregiver quality of life scale scores <sup>a</sup>**

|                                                                                             | Assistance in IADLS                                                               | Assistance in ADLS                                                                | Personal Time                                                                     | Role Limitations Due to Caregiving                                                | Family Involvement                                                                                                               | Demands of Caregiving                                                                                                        | Worry                                                                                                                       | Caregiver Feelings                                                                 | Spirituality and Faith                                                            | Benefits of Caregiving                                                                                                       |
|---------------------------------------------------------------------------------------------|-----------------------------------------------------------------------------------|-----------------------------------------------------------------------------------|-----------------------------------------------------------------------------------|-----------------------------------------------------------------------------------|----------------------------------------------------------------------------------------------------------------------------------|------------------------------------------------------------------------------------------------------------------------------|-----------------------------------------------------------------------------------------------------------------------------|------------------------------------------------------------------------------------|-----------------------------------------------------------------------------------|------------------------------------------------------------------------------------------------------------------------------|
| <b>Caregiver Characteristics and Perceptions</b>                                            |                                                                                   |                                                                                   |                                                                                   |                                                                                   |                                                                                                                                  |                                                                                                                              |                                                                                                                             |                                                                                    |                                                                                   |                                                                                                                              |
| Age (N = 147)                                                                               | -0.039<br>p = 0.63                                                                | <b>0.236</b><br><b>p = 0.004</b>                                                  | -0.014<br>p = 0.86                                                                | 0.088<br>p = 0.29                                                                 | <b>0.245</b><br><b>p = 0.003</b>                                                                                                 | 0.032<br>p = 0.70                                                                                                            | <b>0.273</b><br><b>p = 0.001</b>                                                                                            | 0.153<br>p = 0.06                                                                  | <b>-0.218</b><br><b>p = 0.008</b>                                                 | <b>-0.299</b><br><b>p = 0.0002</b>                                                                                           |
| Gender (N = 200)<br>1 = Male<br>0 = Female                                                  | 0.079<br>p = 0.26                                                                 | 0.064<br>p = 0.37                                                                 | 0.133<br>p = 0.06                                                                 | 0.011<br>p = 0.88                                                                 | 0.052<br>p = 0.47                                                                                                                | <b>0.196</b><br><b>p = 0.005</b>                                                                                             | <b>0.205</b><br><b>p = 0.004</b>                                                                                            | <b>0.268</b><br><b>p = 0.0001</b>                                                  | <b>-0.204</b><br><b>p = 0.004</b>                                                 | -0.010<br>p = 0.88                                                                                                           |
| Ethnicity (N = 148)<br>1 = white<br>0 = non-white                                           | 0.104<br>p = 0.21                                                                 | <b>0.327</b><br><b>p &lt;.0001</b>                                                | 0.007<br>p = 0.94                                                                 | -0.084<br>p = 0.31                                                                | 0.185<br>p = 0.02                                                                                                                | 0.028<br>p = 0.74                                                                                                            | 0.169<br>p = 0.04                                                                                                           | -0.020<br>p = 0.81                                                                 | <b>-0.385</b><br><b>p &lt;.0001</b>                                               | <b>-0.393</b><br><b>p &lt;.0001</b>                                                                                          |
| Marital Status (N = 178)<br>1 = married<br>0 = not married                                  | -0.113<br>p = 0.13                                                                | <b>0.191</b><br><b>p = 0.01</b>                                                   | 0.005<br>p = 0.95                                                                 | 0.094<br>p = 0.21                                                                 | <b>0.230</b><br><b>p = 0.002</b>                                                                                                 | 0.112<br>p = 0.14                                                                                                            | 0.174<br>p = 0.02                                                                                                           | 0.164<br>p = 0.03                                                                  | <b>-0.248</b><br><b>p = 0.001</b>                                                 | -0.160<br>p = 0.03                                                                                                           |
| Education (N = 147)<br>1 = At least college degree<br>0 = Less than college degree          | 0.051<br>p = 0.54                                                                 | 0.066<br>p = 0.43                                                                 | 0.084<br>p = 0.31                                                                 | -0.026<br>p = 0.76                                                                | 0.060<br>p = 0.47                                                                                                                | 0.059<br>p = 0.48                                                                                                            | <b>0.213</b><br><b>p = 0.01</b>                                                                                             | 0.088<br>p = 0.29                                                                  | -0.168<br>p = 0.04                                                                | -0.099<br>p = 0.23                                                                                                           |
| Relationship (N = 200)<br>S = Spouse<br>C = Child<br>O = Other<br>F = F-statistic for ANOVA | Mean scores from Anova<br>S = 18.8<br>C = 25.5<br>O = 18.5<br>F = 2.4<br>p = 0.09 | Mean scores from Anova<br>S = 70.0<br>C = 56.5<br>O = 60.4<br>F = 3.2<br>p = 0.04 | Mean scores from Anova<br>S = 41.4<br>C = 47.9<br>O = 49.0<br>F = 2.2<br>p = 0.12 | Mean scores from Anova<br>S = 52.0<br>C = 47.1<br>O = 57.7<br>F = 2.2<br>p = 0.11 | <b>Mean scores from Anova</b><br><b>S = 62.1</b><br><b>C = 43.0</b><br><b>O = 50.3</b><br><b>F = 13.0</b><br><b>p &lt;0.0001</b> | <b>Mean scores from Anova</b><br><b>S = 55.3</b><br><b>C = 44.5</b><br><b>O = 56.5</b><br><b>F = 5.8</b><br><b>p = 0.004</b> | <b>Mean scores from Anova</b><br><b>S = 54.1</b><br><b>C = 45.2</b><br><b>O = 53.0</b><br><b>F = 4.7</b><br><b>p = 0.01</b> | Mean scores from Anova<br>S = 68.7<br>C = 60.8<br>O = 73.8<br>F = 5.6<br>p = 0.004 | Mean scores from Anova<br>S = 57.1<br>C = 68.1<br>O = 70.5<br>F = 2.8<br>p = 0.06 | <b>Mean scores from Anova</b><br><b>S = 63.7</b><br><b>C = 71.2</b><br><b>O = 79.2</b><br><b>F = 5.5</b><br><b>p = 0.005</b> |
| Hours spent each week caring for relative/ friend with dementia (N = 200)                   | <b>-0.679</b><br><b>p &lt; 0.0001</b>                                             | <b>-0.403</b><br><b>p &lt; 0.0001</b>                                             | <b>-0.562</b><br><b>p &lt; 0.0001</b>                                             | <b>-0.426</b><br><b>p &lt; 0.0001</b>                                             | <b>-0.200</b><br><b>p = 0.005</b>                                                                                                | <b>-0.263</b><br><b>p = 0.0002</b>                                                                                           | <b>-0.249</b><br><b>p = 0.0004</b>                                                                                          | <b>-0.278</b><br><b>p &lt; 0.0001</b>                                              | 0.141<br>p = 0.05                                                                 | 0.092<br>p = 0.20                                                                                                            |
| Time being a caregiver to relative/ friend with dementia (N = 200)                          | <b>-0.192</b><br><b>p = 0.007</b>                                                 | -0.163<br>p = 0.02                                                                | -0.076<br>p = 0.28                                                                | -0.083<br>p = 0.24                                                                | -0.116<br>p = 0.10                                                                                                               | -0.088<br>p = 0.22                                                                                                           | -0.124<br>p = 0.08                                                                                                          | -0.171<br>p = 0.02                                                                 | -0.010<br>p = 0.88                                                                | 0.017<br>p = 0.81                                                                                                            |
| Average number of months as primary caregiver during past year (N = 200)                    | <b>-0.202</b><br><b>p = 0.004</b>                                                 | 0.078<br>p = 0.27                                                                 | <b>-0.198</b><br><b>p = 0.005</b>                                                 | -0.161<br>p = 0.02                                                                | -0.103<br>p = 0.15                                                                                                               | -0.121<br>p = 0.09                                                                                                           | -0.116<br>p = 0.10                                                                                                          | -0.154<br>p = 0.03                                                                 | -0.018<br>p = 0.80                                                                | -0.052<br>p = 0.46                                                                                                           |

**Table S1: Associations between caregiver and patient characteristics and caregiver quality of life scales <sup>a</sup> (cont.)**

|                                                                                            | Assistance in IADLS               | Assistance in ADLS                 | Personal Time                     | Role Limitations Due to Caregiving | Family Involvement                | Demands of Caregiving             | Worry                            | Caregiver Feelings                | Spirituality and Faith             | Benefits of Caregiving             |
|--------------------------------------------------------------------------------------------|-----------------------------------|------------------------------------|-----------------------------------|------------------------------------|-----------------------------------|-----------------------------------|----------------------------------|-----------------------------------|------------------------------------|------------------------------------|
| Amount of help caregiver needed in caring that was received (0 - 100) (N=200) <sup>b</sup> | <b>0.192</b><br>p = <b>0.007</b>  | <b>0.174</b><br>p = <b>0.01</b>    | <b>0.391</b><br>p< <b>0.0001</b>  | <b>0.308</b><br>p < <b>0.0001</b>  | <b>0.495</b><br>p < <b>0.0001</b> | <b>0.277</b><br>p < <b>0.0001</b> | <b>0.225</b><br>p = <b>0.001</b> | <b>0.193</b><br>p = <b>0.005</b>  | -0.139<br>p = 0.05                 | -0.067<br>p = 0.34                 |
| Overall experience as a caregiver (0 - 10) (N=200) <sup>c</sup>                            | 0.074<br>p = 0.30                 | -0.116<br>p = 0.10                 | <b>0.219</b><br>p = <b>0.002</b>  | <b>0.251</b><br>p = <b>0.0003</b>  | 0.060<br>p = 0.40                 | <b>0.453</b><br>p < <b>0.0001</b> | <b>0.188</b><br>p = <b>0.008</b> | <b>0.388</b><br>p < <b>0.0001</b> | <b>0.199</b><br>p = <b>0.005</b>   | <b>0.556</b><br>p < <b>0.0001</b>  |
| <b>Patient Characteristics</b>                                                             |                                   |                                    |                                   |                                    |                                   |                                   |                                  |                                   |                                    |                                    |
| Age (N = 198)                                                                              | 0.011<br>p = 0.88                 | -0.069<br>p = 0.92                 | 0.009<br>p = 0.90                 | -0.087<br>p = 0.23                 | -0.117<br>p = 0.10                | -0.117<br>p = 0.10                | -0.026<br>p = 0.71               | -0.101<br>p = 0.16                | <b>-0.177</b><br>p = <b>0.01</b>   | -0.044<br>p = 0.54                 |
| Gender (N = 198)<br>1 = Male<br>0 = Female                                                 | -0.089<br>p = 0.21                | 0.137<br>p = 0.06                  | <b>-0.202</b><br>p = <b>0.004</b> | -0.055<br>p = 0.44                 | 0.131<br>p = 0.07                 | -0.009<br>p = 0.90                | -0.049<br>p = 0.50               | <b>-0.207</b><br>p = <b>0.003</b> | -0.059<br>p = 0.40                 | -0.083<br>p = 0.24                 |
| Ethnicity (N = 196)<br>1 = white<br>0 = non-white                                          | 0.085<br>p = 0.23                 | <b>0.213</b><br>p = <b>0.003</b>   | 0.031<br>p = 0.67                 | -0.034<br>p = 0.64                 | 0.159<br>p = 0.03                 | 0.074<br>p = 0.30                 | 0.171<br>p = 0.02                | 0.016<br>p = 0.82                 | <b>-0.338</b><br>p < <b>0.0001</b> | <b>-0.339</b><br>p < <b>0.0001</b> |
| Marital Status (N = 198)<br>1 = married<br>0 = not married                                 | -0.088<br>p = 0.22                | 0.113<br>p = 0.11                  | -0.089<br>p = 0.21                | 0.067<br>p = 0.35                  | <b>0.339</b><br>p < <b>0.0001</b> | 0.135<br>p = 0.06                 | 0.147<br>p = 0.04                | 0.109<br>p = 0.13                 | -0.144<br>p = 0.04                 | -0.173<br>p = 0.02                 |
| Education (N = 194)<br>1 = At least college degree<br>0 = Less than college Degree         | 0.046<br>p = 0.52                 | <b>0.189</b><br>p = <b>0.01</b>    | 0.084<br>p = 0.24                 | 0.011<br>p = 0.88                  | <b>0.273</b><br>p < <b>0.0001</b> | <b>0.179</b><br>p = <b>0.01</b>   | <b>0.249</b><br>p= <b>0.0005</b> | 0.096<br>p = 0.19                 | <b>-0.348</b><br>p < <b>0.0001</b> | <b>-0.223</b><br>p = <b>0.002</b>  |
| Dementia Severity (N = 144)<br>1 = Mild<br>2 = Intermediate<br>3 = Advanced                | <b>-0.246</b><br>p = <b>0.003</b> | <b>-0.378</b><br>p < <b>0.0001</b> | -0.103<br>p = 0.22                | -0.035<br>p = 0.68                 | -0.053<br>p = 0.53                | 0.039<br>p = 0.64                 | 0.039<br>p = 0.65                | 0.059<br>p = 0.50                 | 0.181<br>p = 0.03                  | 0.103<br>p = 0.22                  |

<sup>a</sup> Higher values for caregiver quality-of-life scale scores mean better functioning and well-being. Bolded values are Pearson associations where  $p \leq 0.01$ .

<sup>b</sup> Higher values mean less unmet need for caregiving assistance

<sup>c</sup> Higher values mean better overall experience as a caregiver.
